# Supplementary material for: The changing global distribution and prevalence of canine transmissible venereal tumour
Source: PubMed Central journal article supplement (PMC4152766; doi:10.1186/s12917-014-0168-9), 2014-09-03
Supplement: s12917-014-0168-9-S3.pdf [file s12917-014-0168-9-S3.pdf]

**Additional file 3. Historical reports confirming presence of CTVT in the United Kingdom in the 19<sup>th</sup> and 20<sup>th</sup> centuries.**

| Year | Town                   | Author          | Comment                                                                                                                                                                                                                                                                                                                                        |
|------|------------------------|-----------------|------------------------------------------------------------------------------------------------------------------------------------------------------------------------------------------------------------------------------------------------------------------------------------------------------------------------------------------------|
| 1810 | UK (London)            | D. P. Blaine    | two parts only are subject to a cancerous affection [mammary tumour and canine transmissible venereal tumour]                                                                                                                                                                                                                                  |
| 1897 | UK (London)            | G. B. Smith     | Dog A served 12 bitches, eleven of which became infected.                                                                                                                                                                                                                                                                                      |
| 1898 | UK (London)            | G. B. Smith     | Since the beginning of the year 1896 we have had under observation a series of contagious tumours on the genital organs of dogs                                                                                                                                                                                                                |
| 1900 | UK (London)            | F. Hobday       | In stud dogs their [CTVT tumours] presence is to be regarded with great suspicion                                                                                                                                                                                                                                                              |
| 1902 | UK (Leeds)             | C. Powell White | I have had the opportunity of examining two similar cases, which present several points of interest. The animals affected were valuable pure-bred bulldogs. The                                                                                                                                                                                |
| 1905 | UK (London)            | F. Hobday       | Inside the prepuce and on the mucous surface of the penis one meets with another variety, the infective venereal tumour... It appears to be most commonly met with in the bulldog variety, and the author has also seen it in St. Bernards, terriers, poodles and pugs, although there is no reason why it should be confined to these breeds. |
| 1906 | UK (London)            | F. Hobday       | In the vagina of the bitch one frequently meets with a species of ulcerating contagious venereal tumour which is communicable to the male when the animals are used for stud purposes                                                                                                                                                          |
| 1907 | UK (Edinburgh, London) | H. Wade         | The disease known as infective sarcoma is one which occurs in dogs. It is not uncommon... In this country, on the continent of Europe, and in the United States of America it is frequently met with.                                                                                                                                          |
| 1954 | UK (London)            | E. Cotchin      | [tumours occur] less commonly in London dogs                                                                                                                                                                                                                                                                                                   |
| 1969 | UK (Liverpool)         | J. C. Howell    | Since 1959 we have diagnosed 13 cases of canine T.V.T.. Eleven of the dogs were owned... Of the other two, one came from Stafford. In only one case was there a history of the dog having lived abroad and this was an animal that had been in Ghana some four to five years before symptoms associated with T.V.T. developed.                 |
| 1969 | UK (London)            | R. C. White     | I have not seen this condition in this country, but I have examined a number of cases while I was abroad.                                                                                                                                                                                                                                      |
