# Supplementary material for: The changing global distribution and prevalence of canine transmissible venereal tumour
Source: PubMed Central journal article supplement (PMC4152766; doi:10.1186/s12917-014-0168-9), 2014-09-03
Supplement: s12917-014-0168-9-S4.pdf [file s12917-014-0168-9-S4.pdf]

**Additional file 4. Contemporary and historical reports providing a numerical value for CTVT prevalence.**

| Year | Location                  | Prevalence (%) | Details                                                | Author            | Title                                                                                                                     | Reference                                |
|------|---------------------------|----------------|--------------------------------------------------------|-------------------|---------------------------------------------------------------------------------------------------------------------------|------------------------------------------|
| 1938 | France (Toulouse)         | 1.8%           | 103 CTVT cases in 5643 dogs                            | R. Lasserre       | Recherches sur le Cancer des animaux domestiques                                                                          | Rev Med Vet 90, 425-451, 1938            |
| 1968 | Jamaica (Kingston)        | 0.8%           | 8 CTVT cases in 1000 dogs                              | M. J. Thorburn    | Pathological and cytogenetic observations on the naturally occurring Canine Venereal Tumour in Jamaica (Sticker's tumour) | Brit J Cancer 22, 4, 720-727, 1968       |
| 1969 | Nigeria (Lagos)           | 11.9%          | 38 CTVT cases out of 318 dogs presented at the clinic  | G. O. Esuruoso    | Observations in An experimental Veterinary Clinic in the Ikeja Airport Area of Lagos                                      | Nigerian Vet J 1, 7-15, 1972             |
| 1972 | Kenya (Kabete)            | 1.0%           | Reported prevalence in the population                  | D. Rottcher       | Clinical features and pathology of transmissible venereal tumours in dogs in Kenya                                        | Tierarztl Umschau 27, 235-238, 1972      |
| 1974 | Kenya (Kabete)            | 3.7%           | 55 CTVT cases in 1498 post mortem and biopsy cases     | A. Kimeto         | Transmissible Venereal Tumour of Dog in Kenya                                                                             | B Anim Health Prod Afr 22, 327-329, 1974 |
| 1985 | Papua New Guinea (Boroko) | 16.0%          | 28 CTVT cases in 170 necropsied dogs (between 1982-83) | A.N. Hamir        | Primary penile and nasal transmissible venereal tumours in a dog                                                          | Aust Vet J, 62, 12, 430-432, 1985        |
| 1986 | Papua New Guinea (Boroko) | 19.8%          | 53 CTVT cases 268 post mortem examinations             | A. N. Hamir       | Neoplasms of dogs in Papua New Guinea                                                                                     | Aust Vet J 63, 10, 342-343, 1986         |
| 1998 | Brazil (Jaboticabal)      | 1.9%           | 400 cases seen in a 12 year period                     | R. A. Sobral      | Occurrence of canine transmissible venereal tumor in dogs from the Jaboticabal region, Brazil                             | Ars Veterinaria 14, 1, 1-10, 1998        |
| 2003 | Mexico (Merida - Yucatan) | 2.6%           | 8 CTVT cases in 303 dogs                               | A. Ortega-Pacheco | Prevalence of transmissible venereal tumor of stray dogs in Merida, Yucatan, Mexico                                       | Rev Biomed 14, 83-87, 2003               |
| 2004 | Brazil (Botucatu)         | 9.9%           | 576 CTVT cases out of 5798 cytological exams           | A. S. Amaral      | Cytological diagnosis of transmissible venereal tumor in the Botucatu region, Brazil (descriptive study: 1994-2003)       | RPCV 99, 167-171, 2004                   |

|      |                           |                        |                                                                            |                                 |                                                                                                                                                                        |                                         |
|------|---------------------------|------------------------|----------------------------------------------------------------------------|---------------------------------|------------------------------------------------------------------------------------------------------------------------------------------------------------------------|-----------------------------------------|
| 2004 | Peru (Lima)               | <b>8.4%</b>            | 78 CTVT cases in 925 dogs examined                                         | N. Mendoza                      | Frequency of the Transmissible Venereal Tumour in Dogs: Caseload in the Pathology Laboratory of the National University of San Marcos (Period 1998-2004)               | Rev Inv Vet Peru 21, 1, 42-47, 2010     |
| 2006 | Mexico (Merida - Yucatan) | <b>5.4%</b>            | 318 post mortem examinations of male stray dogs                            | A. Ortega-Pacheco               | Pathological Conditions of the Reproductive Organs of Male Stray Dogs in the Tropics: Prevalence, Risk Factors, Morphological Findings and Testosterone Concentrations | Reprod Dom Anim 41, 429-437, 2006       |
| 2007 | Mexico (Merida - Yucatan) | <b>15.3%</b>           | 300 post mortem examinations of female stray dogs                          | A. Ortega-Pacheco               | Reproductive patterns and reproductive pathologies of stray bitches in the tropics                                                                                     | Theriogenology 67, 382-390, 2007        |
| 2009 | India (Nagpur)            | <b>1.3%</b>            | 73 CTVT cases in 5877 dogs examined                                        | L. A. Khan                      | Incidence of Venereal Granuloma and its Medicinal Treatment in stray Dogs of Nagpur City                                                                               | Vet World 2, 1, 13-14, 2009             |
| 2010 | Mexico (Mexico City)      | <b>17.5%</b>           | 717 dogs examined                                                          | J. C. Cruz                      | Canine Transmissible Venereal Tumor in the Metropolitan Area of Mexico City                                                                                            | Revista Cientifica 20, 4, 362-366, 2010 |
| 2010 | Bangladesh (Dhaka)        | <b>0.5%</b>            | 20 CTVT cases recorded out of 3670 sick pet dogs presented at the hospital | M. Tarafder                     | Prevalence of clinical diseases of pet dogs and risk perception of zoonotic infection by dog owners in Bangladesh                                                      | Bangl J Vet Med 8, 2, 163-174, 2010     |
| 2011 | India (Chennai)           | <b>2.7% in males</b>   | 18 CTVT cases in 668 dogs examined                                         | T. Sathiamoorthy                | Prevalence of reproductive disorders in the stray dogs of Chennai City                                                                                                 | JIVA 9, 2, 62-63, 2011                  |
| 2011 | India (Chennai)           | <b>3.9% in females</b> | 24 CTVT cases in 615 dogs examined                                         | T. Sathiamoorthy                | Prevalence of reproductive disorders in the stray dogs of Chennai City                                                                                                 | JIVA 9, 2, 62-63, 2011                  |
| 2013 | Ecuador (Otavalo)         | <b>2.3%</b>            | 5 CTVT cases out of 216 sterilized dogs                                    | A. Strakova and E. P. Murchison | Personal experience                                                                                                                                                    |                                         |
