# Supplementary material for: The changing global distribution and prevalence of canine transmissible venereal tumour
Source: PubMed Central journal article supplement (PMC4152766; doi:10.1186/s12917-014-0168-9), 2014-09-03
Supplement: s12917-014-0168-9-S6.pdf [file s12917-014-0168-9-S6.pdf]

**Additional file 6. Summary of CTVT prevalence data by country.**

| <b>Country</b>         | <b>Higher confidence average CTVT prevalence (3 or more responses)</b> | <b>Lower confidence average CTVT prevalence (1-2 responses)</b> | <b>Number of responses</b> |
|------------------------|------------------------------------------------------------------------|-----------------------------------------------------------------|----------------------------|
| Afghanistan            | N/A                                                                    | No data                                                         | 1                          |
| Albania                | N/A                                                                    | N/A                                                             | 0                          |
| Algeria                | N/A                                                                    | 1-3%                                                            | 1                          |
| American Samoa         | N/A                                                                    | 3-5%                                                            | 2                          |
| Andorra                | N/A                                                                    | N/A                                                             | 0                          |
| Angola                 | N/A                                                                    | N/A                                                             | 0                          |
| Antigua and Barbuda    | N/A                                                                    | N/A                                                             | 0                          |
| Argentina              | 5-10%                                                                  | N/A                                                             | 3                          |
| Armenia                | N/A                                                                    | 1-3%                                                            | 1                          |
| Australia              | Less than 0.5%                                                         | N/A                                                             | 18                         |
| Austria                | N/A                                                                    | None                                                            | 2                          |
| Azerbaijan             | N/A                                                                    | N/A                                                             | 0                          |
| Bahamas                | N/A                                                                    | 0.5-1%                                                          | 2                          |
| Bahrain                | N/A                                                                    | N/A                                                             | 0                          |
| Bangladesh             | 1-3%                                                                   | N/A                                                             | 4                          |
| Barbados               | N/A                                                                    | 0.5-1%                                                          | 1                          |
| Belarus                | 0.5-1%                                                                 | N/A                                                             | 9                          |
| Belgium                | N/A                                                                    | None                                                            | 2                          |
| Belize                 | 10-20%                                                                 | N/A                                                             | 6                          |
| Benin                  | N/A                                                                    | N/A                                                             | 0                          |
| Bhutan                 | N/A                                                                    | N/A                                                             | 0                          |
| Bolivia                | N/A                                                                    | N/A                                                             | 0                          |
| Bosnia and Herzegovina | N/A                                                                    | N/A                                                             | 0                          |
| Botswana               | 5-10%                                                                  | N/A                                                             | 4                          |
| Brazil                 | 1-3%                                                                   | N/A                                                             | 10                         |
| Brunei                 | N/A                                                                    | N/A                                                             | 0                          |
| Bulgaria               | N/A                                                                    | 0.5-1%                                                          | 1                          |
| Burkina                | N/A                                                                    | N/A                                                             | 0                          |
| Burma (Myanmar)        | N/A                                                                    | N/A                                                             | 0                          |
| Burundi                | N/A                                                                    | N/A                                                             | 0                          |
| Cambodia               | N/A                                                                    | 5-10%                                                           | 1                          |
| Cameroon               | N/A                                                                    | N/A                                                             | 0                          |

|                               |                |         |    |
|-------------------------------|----------------|---------|----|
| Canada                        | None           | N/A     | 3  |
| Cape Verde                    | N/A            | N/A     | 0  |
| Central African Republic      | N/A            | N/A     | 0  |
| Chad                          | N/A            | N/A     | 0  |
| Chile                         | 3-5%           | N/A     | 11 |
| China                         | Less than 0.5% | N/A     | 20 |
| Colombia                      | N/A            | 1-3%    | 2  |
| Comoros                       | N/A            | N/A     | 0  |
| Congo                         | N/A            | N/A     | 0  |
| Congo, Democratic Republic of | N/A            | N/A     | 0  |
| Costa Rica                    | 3-5%           | N/A     | 3  |
| Croatia                       | N/A            | N/A     | 0  |
| Cuba                          | 3-5%           | N/A     | 3  |
| Cyprus                        | N/A            | No data | 1  |
| Czech Republic                | None           | N/A     | 4  |
| Denmark                       | N/A            | None    | 1  |
| Djibouti                      | N/A            | N/A     | 0  |
| Dominica                      | N/A            | 3-5%    | 1  |
| Dominican Republic            | 1-3%           | N/A     | 3  |
| East Timor (Timor-Leste)      | N/A            | 3-5%    | 1  |
| Ecuador                       | 3-5%           | N/A     | 4  |
| Egypt                         | N/A            | 1-3%    | 1  |
| El Salvador                   | N/A            | N/A     | 0  |
| Equatorial Guinea             | N/A            | N/A     | 0  |
| Eritrea                       | N/A            | N/A     | 0  |
| Estonia                       | Less than 0.5% | N/A     | 3  |
| Ethiopia                      | N/A            | N/A     | 0  |
| Fiji                          | N/A            | 3-5%    | 2  |
| Finland                       | None           | N/A     | 3  |
| France                        | Less than 0.5% | N/A     | 4  |
| Gabon                         | N/A            | N/A     | 0  |
| Gambia                        | N/A            | 10-20%  | 1  |
| Georgia                       | N/A            | N/A     | 0  |
| Germany                       | N/A            | None    | 1  |
| Ghana                         | 5-10%          | N/A     | 3  |
| Greece                        | 1-3%           | N/A     | 4  |
| Grenada                       | N/A            | 10-20%  | 2  |
| Guatemala                     | N/A            | N/A     | 0  |

|               |                |                   |    |
|---------------|----------------|-------------------|----|
| Guinea        | N/A            | N/A               | 0  |
| Guinea-Bissau | N/A            | N/A               | 0  |
| Guyana        | N/A            | 3-5%              | 1  |
| Haiti         | N/A            | N/A               | 0  |
| Honduras      | N/A            | 5-10%             | 1  |
| Hungary       | N/A            | Less than<br>0.5% | 2  |
| Iceland       | N/A            | N/A               | 0  |
| India         | 1-3%           | N/A               | 7  |
| Indonesia     | N/A            | N/A               | 0  |
| Iran          | N/A            | 1-3%              | 1  |
| Iraq          | N/A            | N/A               | 0  |
| Ireland       | N/A            | N/A               | 0  |
| Israel        | Less than 0.5% | N/A               | 41 |
| Italy         | Less than 0.5% | N/A               | 23 |
| Ivory Coast   | N/A            | 10-20%            | 2  |
| Jamaica       | N/A            | N/A               | 0  |
| Japan         | Less than 0.5% | N/A               | 3  |
| Jordan        | N/A            | N/A               | 0  |
| Kazakhstan    | N/A            | Less than<br>0.5% | 1  |
| Kenya         | 3-5%           | N/A               | 7  |
| Kiribati      | N/A            | N/A               | 0  |
| Korea, North  | N/A            | N/A               | 0  |
| Korea, South  | N/A            | N/A               | 0  |
| Kuwait        | N/A            | None              | 2  |
| Kyrgyzstan    | N/A            | 0.5-1%            | 1  |
| Laos          | N/A            | N/A               | 0  |
| Latvia        | N/A            | N/A               | 0  |
| Lebanon       | N/A            | N/A               | 0  |
| Lesotho       | N/A            | More than<br>20%  | 1  |
| Liberia       | N/A            | 1-3%              | 1  |
| Libya         | N/A            | 1-3%              | 1  |
| Liechtenstein | N/A            | N/A               | 0  |
| Lithuania     | N/A            | N/A               | 0  |
| Luxembourg    | N/A            | N/A               | 0  |
| Macedonia     | 5-10%          | N/A               | 3  |
| Madagascar    | N/A            | N/A               | 0  |
| Malawi        | 3-5%           | N/A               | 3  |
| Malaysia      | 3-5%           | N/A               | 5  |
| Maldives      | N/A            | N/A               | 0  |
| Mali          | 1-3%           | N/A               | 3  |

|                       |                |               |     |
|-----------------------|----------------|---------------|-----|
| Malta                 | N/A            | None          | 1   |
| Marshall Islands      | N/A            | N/A           | 0   |
| Mauritania            | N/A            | N/A           | 0   |
| Mauritius             | 3-5%           | N/A           | 3   |
| Mexico                | 5-10%          | N/A           | 5   |
| Micronesia            | N/A            | 3-5%          | 1   |
| Moldova               | N/A            | N/A           | 0   |
| Monaco                | N/A            | N/A           | 0   |
| Mongolia              | N/A            | N/A           | 0   |
| Montenegro            | N/A            | N/A           | 0   |
| Morocco               | N/A            | More than 20% | 1   |
| Mozambique            | 5-10%          | N/A           | 6   |
| Namibia               | N/A            | 1-3%          | 1   |
| Nauru                 | N/A            | N/A           | 0   |
| Nepal                 | N/A            | N/A           | 0   |
| Netherlands           | None           | N/A           | 3   |
| New Zealand           | None           | N/A           | 3   |
| Nicaragua             | 5-10%          | N/A           | 3   |
| Niger                 | N/A            | N/A           | 0   |
| Nigeria               | 1-3%           | N/A           | 8   |
| Norway                | None           | N/A           | 3   |
| Oman                  | N/A            | N/A           | 0   |
| Pakistan              | 1-3%           | N/A           | 3   |
| Palau                 | N/A            | N/A           | 0   |
| Panama                | 1-3%           | N/A           | 3   |
| Papua New Guinea      | N/A            | N/A           | 0   |
| Paraguay              | 3-5%           | N/A           | 3   |
| Peru                  | 3-5%           | N/A           | 4   |
| Philippines           | 1-3%           | N/A           | 4   |
| Poland                | N/A            | N/A           | 0   |
| Portugal              | Less than 0.5% | N/A           | 4   |
| Puerto Rico           | N/A            | 0.5-1%        | 1   |
| Qatar                 | N/A            | N/A           | 0   |
| Reunion               | Less than 0.5% | N/A           | 4   |
| Romania               | 5-10%          | N/A           | 3   |
| Russian Federation    | 1-3%           | N/A           | 102 |
| Rwanda                | N/A            | N/A           | 0   |
| Saint Kitts and Nevis | N/A            | 1-3%          | 2   |
| Saint Lucia           | N/A            | N/A           | 0   |

|                                  |                |                |    |
|----------------------------------|----------------|----------------|----|
| Saint Vincent and the Grenadines | N/A            | 1-3%           | 1  |
| Samoa                            | 5-10%          | N/A            | 3  |
| San Marino                       | N/A            | N/A            | 0  |
| Sao Tome and Principe            | N/A            | N/A            | 0  |
| Saudi Arabia                     | N/A            | N/A            | 0  |
| Senegal                          | N/A            | 0.5-1%         | 1  |
| Serbia                           | N/A            | N/A            | 0  |
| Seychelles                       | N/A            | N/A            | 0  |
| Sierra Leone                     | N/A            | N/A            | 0  |
| Singapore                        | N/A            | Less than 0.5% | 2  |
| Slovakia                         | N/A            | N/A            | 0  |
| Slovenia                         | N/A            | None           | 2  |
| Solomon Islands                  | N/A            | 0.5-1%         | 2  |
| Somalia                          | N/A            | N/A            | 0  |
| South Africa                     | 0.5-1%         | N/A            | 23 |
| South Sudan                      | N/A            | N/A            | 0  |
| Spain                            | Less than 0.5% | N/A            | 14 |
| Sri Lanka                        | N/A            | 3-5%           | 2  |
| Sudan                            | N/A            | N/A            | 0  |
| Suriname                         | 0.5-1%         | N/A            | 4  |
| Swaziland                        | N/A            | 1-3%           | 2  |
| Sweden                           | None           | N/A            | 5  |
| Switzerland                      | None           | N/A            | 4  |
| Syria                            | N/A            | N/A            | 0  |
| Taiwan                           | N/A            | 0.5-1%         | 1  |
| Tajikistan                       | N/A            | N/A            | 0  |
| Tanzania                         | Less than 0.5% | N/A            | 3  |
| Thailand                         | 5-10%          | N/A            | 6  |
| Togo                             | N/A            | N/A            | 0  |
| Tonga                            | N/A            | N/A            | 0  |
| Trinidad and Tobago              | N/A            | Less than 0.5% | 1  |
| Tunisia                          | N/A            | 0.5-1%         | 1  |
| Turkey                           | 3-5%           | N/A            | 3  |
| Turkmenistan                     | N/A            | N/A            | 0  |
| Tuvalu                           | N/A            | N/A            | 0  |
| Uganda                           | 1-3%           | N/A            | 4  |
| Ukraine                          | 1-3%           | N/A            | 91 |
| United Arab Emirates             | N/A            | N/A            | 0  |

|                                         |                |        |    |
|-----------------------------------------|----------------|--------|----|
| United Kingdom                          | None           | N/A    | 15 |
| United States                           | Less than 0.5% | N/A    | 35 |
| Uruguay                                 | N/A            | 1-3%   | 1  |
| Uzbekistan                              | N/A            | N/A    | 0  |
| Vanuatu                                 | Less than 0.5% | N/A    | 3  |
| Vatican City                            | N/A            | N/A    | 0  |
| Venezuela,<br>Bolivarian<br>Republic of | N/A            | 5-10%  | 2  |
| Viet Nam                                | 1-3%           | N/A    | 3  |
| Yemen                                   | N/A            | N/A    | 0  |
| Zambia                                  | 5-10%          | N/A    | 3  |
| Zimbabwe                                | N/A            | 0.5-1% | 2  |
